# Supplementary material for: Recovery of health-related quality of life after burn injuries: An individual participant data meta-analysis
Source: PubMed Central journal article supplement (PMC6953837; doi:10.1371/journal.pone.0226653), 2020-01-10
Supplement: pone.0226653.s002.pdf [file pone.0226653.s002.pdf]

## S2 Appendix. The 24-month recovery of health-related quality of life (EQ-5D utility) model

| Random effects | Variance | SD    |
|----------------|----------|-------|
| Patient:study  | 0.022    | 0.147 |
| Study          | 0.007    | 0.081 |
| Residual       | 0.036    | 0.190 |

| Fixed effects                 | Estimate | SE    | P value |
|-------------------------------|----------|-------|---------|
| Intercept                     | 0.876    | 0.042 | <0.001  |
| Timepoint 0 months            | -0.665   | 0.070 | <0.001  |
| Timepoint 0.5 months          | -0.217   | 0.051 | <0.001  |
| Timepoint 0.75 months         | -0.176   | 0.045 | <0.001  |
| Timepoint 3 months            | -0.0884  | 0.031 | 0.005   |
| Timepoint 6 months            | -0.0872  | 0.034 | 0.010   |
| Timepoint 9 months            | 0.038    | 0.047 | 0.418   |
| Timepoint 12 months           | -0.020   | 0.029 | 0.494   |
| Timepoint 18 months           | -0.033   | 0.037 | 0.371   |
| Gender                        | 0.003    | 0.027 | 0.925   |
| Length of hospital stay (LOS) | -0.013   | 0.004 | <0.001  |
| %TBSA burned                  | 0.007    | 0.005 | 0.173   |
| Age                           | -0.013   | 0.004 | <0.001  |
| Gender*Timepoint 0 months     | 0.324    | 0.068 | <0.001  |
| Gender*Timepoint 0.5 months   | 0.020    | 0.048 | 0.682   |
| Gender*Timepoint 0.75 months  | 0.075    | 0.042 | 0.079   |
| Gender*Timepoint 3 months     | 0.077    | 0.031 | 0.013   |
| Gender*Timepoint 6 months     | 0.081    | 0.034 | 0.018   |
| Gender*Timepoint 9 months     | 0.027    | 0.045 | 0.541   |
| Gender*Timepoint 12 months    | 0.014    | 0.030 | 0.643   |
| Gender*Timepoint 18 months    | 0.057    | 0.036 | 0.114   |
| LOS*Timepoint 0 months        | 0.024    | 0.008 | 0.003   |
| LOS*Timepoint 0.5 months      | -0.085   | 0.012 | <0.001  |
| LOS*Timepoint 0.75 months     | -0.015   | 0.007 | 0.029   |
| LOS*Timepoint 3 months        | -0.008   | 0.005 | 0.070   |
| LOS*Timepoint 6 months        | 0.006    | 0.005 | 0.207   |
| LOS*Timepoint 9 months        | -0.018   | 0.008 | 0.022   |
| LOS*Timepoint 12 months       | 0.003    | 0.004 | 0.456   |
| LOS*Timepoint 18 months       | -0.001   | 0.006 | 0.914   |
| TBSA*Timepoint 0 months       | -0.047   | 0.010 | <0.001  |
| TBSA*Timepoint 0.5 months     | 0.038    | 0.014 | 0.009   |
| TBSA*Timepoint 0.75 months    | -0.041   | 0.010 | <0.001  |
| TBSA*Timepoint 3 months       | -0.019   | 0.006 | 0.002   |
| TBSA*Timepoint 6 months       | -0.016   | 0.006 | 0.013   |
| TBSA*Timepoint 9 months       | -0.016   | 0.011 | 0.147   |
| TBSA*Timepoint 12 months      | -0.012   | 0.005 | 0.040   |
| TBSA*Timepoint 18 months      | -0.006   | 0.008 | 0.424   |
